# Supplementary material
Source: publisher figshare collection journal article supplement (https://acs.figshare.com/ndownloader/files/4404277)
Supplement: Supplementary file 1 [file 4404277]

## Supporting Information

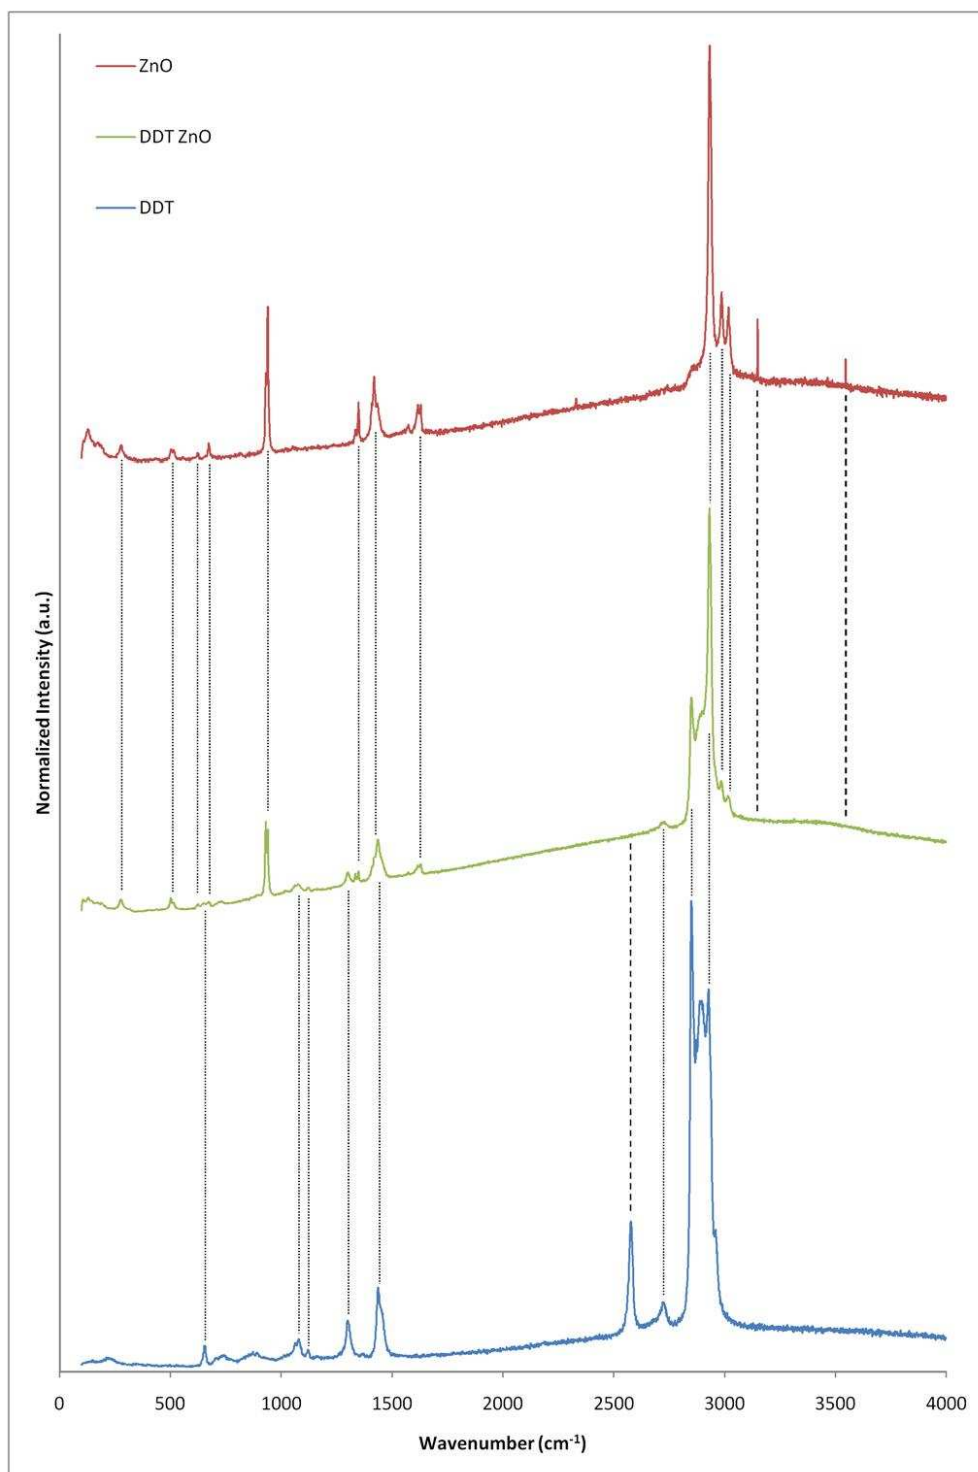

**Figure S1.** Raman spectra of ZnO nanoparticle, dodecanethiol-modified ZnO and dodecanethiol samples (from top to bottom). Both ZnO and dodecanethiol-modified ZnO samples were prepared as solid powders by evaporating the colloid solutions. Dodecanethiol was used as purchased in liquid form at room temperature. All spectra were obtained using a Renishaw System 1000 Raman microscope (Renishaw plc Wotton-under-Edge Gloucestershire, England) under a X50 objective with a HeNe laser giving 10mW of 633nm radiation at the sample. Resolution of better than  $4\text{ cm}^{-1}$  was obtained in all cases. The system was first calibrated to the  $520.5\text{ cm}^{-1}$  band of a silicon wafer and spectra were taken over four (4) accumulations of scans from  $4000 - 100\text{ cm}^{-1}$  using a 40 sec time constant.
